# Supplementary material
Source: publisher figshare collection journal article supplement (https://sage.figshare.com/ndownloader/files/16621073)
Supplement: Supplementary file 1 [file 16621073]

Supplementary Material for “Adaptive Learning Recommendation Strategy Based on  
Deep Q-learning”

Chunxi Tan, Ruijian Han, Rougang Ye and Kani Chen\*

Department of Mathematics, Hong Kong University of Science and Technology, Clear  
Water Bay, Kowloon, Hong Kong

\*Corresponding Author: makchen@ust.hk (Kani Chen)

Supplementary Material for “Adaptive Learning Recommendation Strategy Based on  
Deep Q-learning”

We provide the full algorithm and training details below.

- $\theta$  is updated for each iteration following the gradient of  $L(\theta)$ , using the method of stochastic gradient descent with Adam (Kingma & Ba, 2014).

- In order to mitigate the overestimate issue in predicting Q-values (Thrun & Schwartz, 1993) for the DQN method, we use the approach proposed by Hasselt, Guez, and Silver (2016) and rewrite the target as

$$y_i = R(t) + Q_{i-1}(\hat{\mathbf{s}}(t+1), \arg \max_a Q_i(\hat{\mathbf{s}}(t+1), a, t+1; \theta_i), t+1; \theta_i^-).$$

It decomposes the max operation in the target into the action selection, resulting in more stable and reliable results.

- Hyperparameters setting in the training: begin exploration rate  $\epsilon_0 = 0.9$ , end exploration rate  $\epsilon_M = 0.05$ , decay of rate  $\tau = 3000$ , learning rate  $\eta = 0.01$ , memory capacity  $|D| = 30000$ , batch size  $n = 128$ .

- Since the policy is stochastic, we conduct several independent networks to reduce effects from randomness.

- In the toy experiment, we conduct 15,000 episodes in the training and test the policy over 300 trajectories, while we generate 30,000 episodes in the training and test on over 1,000 trajectories in other experiments.

---

**Algorithm 1** Double DQN with assessment model

---

**Input:** Begin exploration rate  $\epsilon_0$ ; Decay of rate  $\tau$ ; End learning rate  $\epsilon_M$ ; Learning rate $\eta$ ; Initialized knowledge state  $\mathbf{s}(0)$ ; Batch size  $n$ ;**Output:** Action-Value function  $Q$ ;

```

1: Initialize replay memory capacity  $D$  to capacity  $N$ ;
2: Initialize action-value function  $Q$  with random weights  $\boldsymbol{\theta}$  and target action-value
   function  $\hat{Q}$  with weights  $\boldsymbol{\theta}^- = \boldsymbol{\theta}$ ;
3: for episode = 1, ...,  $M$  do
4:   Initialize knowledge state  $\hat{\mathbf{s}}(0) = \mathbf{s}(0)$ ;
5:    $\epsilon = \epsilon_M + (\epsilon_0 - \epsilon_M) * \exp\{-\text{episode}/\tau\}$ ;
6:   for  $t = 0, \dots, T - 1$  do
7:     Set  $r(t) = \begin{cases} R(T) + R(T - 1), & \text{if } t = T - 1 \\ R(t), & \text{otherwise} \end{cases}$ 
8:     if have not already taking action  $a_s$  then
9:       With probability  $\epsilon$  select a random action  $a(t)$ ;
10:      otherwise select  $a(t) = \arg \max_a Q(\hat{\mathbf{s}}(t), a, t; \boldsymbol{\theta})$ ;
11:     else
12:        $a(t) = \text{'null'}$ 
13:     Execute action  $a(t)$  in emulator, observe reward  $r(t)$  and estimate the next
       knowledge state  $\hat{\mathbf{s}}(t + 1)$  through assessment model;
14:     Store transition  $(\hat{\mathbf{s}}(t), a(t), r(t), \hat{\mathbf{s}}(t + 1))$  in  $D$ ;
15:     Sample random minibatch with size  $n$  of transitions  $(\hat{\mathbf{s}}(t), a(t), r(t), \hat{\mathbf{s}}(t + 1))$ 
       from  $D$ ;
16:     Select  $a' = \arg \max_a Q(\hat{\mathbf{s}}(t + 1), a, t + 1; \boldsymbol{\theta})$ ;
17:     Set  $y(t) = \begin{cases} r(t), & \text{if } t = T - 1 \\ r(t) + \hat{Q}(\hat{\mathbf{s}}(t + 1), a', t + 1; \boldsymbol{\theta}^-), & \text{otherwise} \end{cases}$ 
18:     Perform a gradient descent step on  $(y(t) - Q(\hat{\mathbf{s}}(t), a(t), t; \boldsymbol{\theta}))^2$  with respect to
       the network parameters  $\boldsymbol{\theta}$  with learning rate  $\eta$ ;
19:     Every  $C$  steps reset  $\hat{Q} = Q$ ;
20:   end for
21: end for

return  $Q(\hat{\mathbf{s}}(t), a, t; \boldsymbol{\theta})$ ;

```

---

## References

- Hasselt, H. v., Guez, A., & Silver, D. (2016). Deep reinforcement learning with double q-learning. In *Proceedings of the thirtieth aaai conference on artificial intelligence* (pp. 2094–2100). AAAI Press. Retrieved from <http://dl.acm.org/citation.cfm?id=3016100.3016191>
- Kingma, D. P., & Ba, J. (2014). Adam: A method for stochastic optimization. *ArXiv preprint arXiv:1412.6980*. Retrieved from <http://arxiv.org/abs/1412.6980>
- Thrun, S., & Schwartz, A. (1993). Issues in using function approximation for reinforcement learning. In D. T. J. E. M. Mozer P. Smolensky & A. Weigend (Eds.), *Proceedings of the 1993 connectionist models summer school*. Mahwah, NJ: Erlbaum Associates.
